# Supplementary material for: Global Burden of Aortic Aneurysm and Attributable Risk Factors from 1990 to 2017
Source: PubMed Central journal article supplement (PMC8103850; doi:10.5334/gh.920), 2021-05-04
Supplement: gh-16-1-920-s3.pdf [file gh-16-1-920-s3.pdf]

**eTable 1 ICD-10 code and subgroups of GBD cause code B.2.8 (Aortic aneurysm).**

| <b>Code</b>   | <b>Disease</b>                                       |
|---------------|------------------------------------------------------|
| <b>I71</b>    | Aortic aneurysm and dissection                       |
| <b>I71.0</b>  | Dissection of aorta                                  |
| <b>I71.00</b> | Dissection of unspecified site of aorta              |
| <b>I71.01</b> | Dissection of thoracic aorta                         |
| <b>I71.02</b> | Dissection of abdominal aorta                        |
| <b>I71.03</b> | Dissection of thoracoabdominal aorta                 |
| <b>I71.1</b>  | Thoracic aortic aneurysm, ruptured                   |
| <b>I71.2</b>  | Thoracic aortic aneurysm, without rupture            |
| <b>I71.3</b>  | Abdominal aortic aneurysm, ruptured                  |
| <b>I71.4</b>  | Abdominal aortic aneurysm, without rupture           |
| <b>I71.5</b>  | Thoracoabdominal aortic aneurysm, ruptured           |
| <b>I71.6</b>  | Thoracoabdominal aortic aneurysm, without rupture    |
| <b>I71.8</b>  | Aortic aneurysm of unspecified site, ruptured        |
| <b>I71.9</b>  | Aortic aneurysm of unspecified site, without rupture |

GBD, global burden of disease; ICD-10, International Classification of Disease 10.

**e-Table 2 The death cases and age-standardized death rate of aortic aneurysm in 1990 and 2017, and its temporal trends from 1990 to 2017 in 195 countries and territories.**

| Countries and territories | 1990                           |                    | 2017                           |                  | 1990-2017              |
|---------------------------|--------------------------------|--------------------|--------------------------------|------------------|------------------------|
|                           | Death cases                    | ASR per 100,000    | Death cases                    | ASR per 100,000  | EAPC                   |
|                           | No. × 10 <sup>3</sup> (95% UI) | No. (95% UI)       | No. × 10 <sup>3</sup> (95% UI) | No. (95% UI)     | No. (95% UI)           |
| Afghanistan               | 79.03(37.51 - 167.81)          | 1.23 (0.63 - 2.6)  | 119.88 (77.88-208.59)          | 1.22 (0.79-2.06) | -0.02 (-0.09 to 0.04)  |
| Albania                   | 21.23(18.95 - 25.26)           | 1 (0.89 - 1.2)     | 43.66 (34.68-53.92)            | 1.07 (0.85-1.32) | 0.41 (0.12 to 0.71)    |
| Algeria                   | 106.05(75.34 - 150.35)         | 0.96 (0.68 - 1.35) | 280.75 (202.9-382.45)          | 0.93 (0.68-1.27) | -0.06 (-0.14 to 0.02)  |
| American Samoa            | 0.73(0.61 - 0.82)              | 4.02 (3.41 - 4.61) | 0.81 (0.7-0.98)                | 2.42 (2.12-2.85) | -2.19 (-2.55 to -1.83) |
| Andorra                   | 4.14(3.06 - 5.33)              | 7.58 (5.69 - 9.64) | 6.99 (5.12-8.9)                | 4.78 (3.46-6.15) | -1.99 (-2.15 to -1.83) |
| Angola                    | 147.17(91.78 - 229.61)         | 4.58 (3.08 - 6.92) | 267.65 (209.36-344.66)         | 3.14 (2.47-3.98) | -1.81 (-1.99 to -1.62) |
| Antigua and Barbuda       | 1.47(1.31 - 1.63)              | 2.7 (2.43 - 2.99)  | 1.93 (1.76-2.14)               | 2.02 (1.83-2.24) | -1.46 (-1.69 to -1.22) |
| Argentina                 | 2150.36(1947.55 - 2418.52)     | 6.83 (6.21 - 7.67) | 2565.24 (2311.44-2871.44)      | 4.64 (4.18-5.19) | -1.78 (-1.97 to -1.58) |
| Armenia                   | 156.96(136.81 - 181.83)        | 6.38 (5.51 - 7.39) | 340.95 (316.95-365.78)         | 8.26 (7.71-8.87) | 1.03 (0.84 to 1.22)    |
| Australia                 | 1447.62(1387.93 - 1501.94)     | 7.14 (6.86 - 7.39) | 1316.73 (1184.95-1453.28)      | 2.89 (2.6-3.2)   | -4 (-4.23 to -3.77)    |
| Austria                   | 440.53(420.46 - 464.64)        | 3.54 (3.39 - 3.73) | 446.33 (409.87-485.54)         | 2.33 (2.14-2.52) | -2.17 (-2.43 to -1.91) |
| Azerbaijan                | 59.37(46.67 - 80.21)           | 1.22 (0.93 - 1.71) | 154.25 (126.56-179.74)         | 2.02 (1.65-2.36) | 1.34 (1.09 to 1.59)    |
| Bahrain                   | 2.35(2.03 - 3)                 | 1.5 (1.26 - 2.02)  | 6.67 (5.7-7.83)                | 0.95 (0.82-1.14) | -2.01 (-2.26 to -1.77) |
| Bangladesh                | 638.87(446.6 - 922.83)         | 1.51 (1.09 - 2.18) | 1686.41 (1323.02-2174.22)      | 1.59 (1.25-2.06) | 0.44 (0.27 to 0.61)    |
| Barbados                  | 9.35(8.22 - 10.63)             | 2.87 (2.54 - 3.23) | 11.84 (10.59-13.3)             | 2.38 (2.13-2.67) | -1.1 (-1.29 to -0.91)  |
| Belarus                   | 276.17(226.25 - 318.46)        | 2.1 (1.72 - 2.42)  | 398.62 (358.94-440.78)         | 2.48 (2.24-2.75) | 0.5 (0.28 to 0.71)     |
| Belgium                   | 791.25(748.14 - 835)           | 4.82 (4.57 - 5.07) | 752.13 (688.8-816.84)          | 2.82 (2.59-3.07) | -2.47 (-2.69 to -2.26) |
| Belize                    | 1.58(1.4 - 1.86)               | 1.73 (1.53 - 2.04) | 3.92 (3.47-4.27)               | 1.68 (1.49-1.84) | -0.8 (-1.24 to -0.35)  |
| Benin                     | 45.9(34.59 - 60.51)            | 2.45 (1.85 - 3.2)  | 67.99 (48.92-92.76)            | 1.69 (1.24-2.28) | -1.6 (-1.77 to -1.43)  |
| Bermuda                   | 4.93(4.04 - 5.75)              | 8.13 (6.7 - 9.46)  | 6.7 (6.06-7.34)                | 5.1 (4.61-5.59)  | -1.94 (-2.09 to -1.79) |
| Bhutan                    | 4.09(2.91 - 5.73)              | 1.95 (1.42 - 2.69) | 13.39 (10.11-17.81)            | 2.53 (1.92-3.35) | 1.1 (1.04 to 1.15)     |
| Bolivia                   | 73.06(42.45 - 102.6)           | 2.49 (1.5 - 3.46)  | 175.94 (132.63-228.06)         | 2.25 (1.71-2.91) | -0.35 (-0.4 to -0.31)  |
| Bosnia and Herzegovina    | 96.96(80.73 - 116.96)          | 2.54 (2.15 - 3.05) | 181.02 (140.62-205.94)         | 3.13 (2.46-3.53) | 0.77 (0.56 to 0.97)    |

| Countries and territories        | 1990                           |                    | 2017                           |                  | 1990-2017              |
|----------------------------------|--------------------------------|--------------------|--------------------------------|------------------|------------------------|
|                                  | Death cases                    | ASR per 100,000    | Death cases                    | ASR per 100,000  | EAPC                   |
|                                  | No. × 10 <sup>3</sup> (95% UI) | No. (95% UI)       | No. × 10 <sup>3</sup> (95% UI) | No. (95% UI)     | No. (95% UI)           |
| Botswana                         | 16.48(12.98 - 20.26)           | 3.34 (2.67 - 4.04) | 25.79 (20.58-32.95)            | 2.35 (1.87-2.97) | -1.45 (-1.62 to -1.28) |
| Brazil                           | 3485.88(3406.06 - 3575.59)     | 4.09 (4 - 4.19)    | 9921.64 (9459.61-10303.31)     | 4.49 (4.29-4.67) | 0.11 (-0.03 to 0.25)   |
| Brunei                           | 5.53(4.36 - 6.8)               | 6.27 (5.13 - 7.58) | 13.18 (11.78-14.81)            | 5.27 (4.7-5.93)  | -0.55 (-0.72 to -0.39) |
| Bulgaria                         | 186.08(172.74 - 198.74)        | 1.57 (1.46 - 1.67) | 292.19 (268.12-316.38)         | 2.15 (1.98-2.32) | 1.32 (1.07 to 1.57)    |
| Burkina Faso                     | 74.47(52.5 - 99.35)            | 1.93 (1.37 - 2.56) | 120.63 (89.9-162.29)           | 1.62 (1.21-2.14) | -0.67 (-0.75 to -0.59) |
| Burundi                          | 91.77(63.72 - 132.14)          | 4.8 (3.38 - 6.69)  | 65.7 (45.42-92.3)              | 1.99 (1.37-2.77) | -3.95 (-4.34 to -3.57) |
| Cambodia                         | 50.62(30.4 - 81.55)            | 1.36 (0.87 - 2.15) | 132.27 (109.35-170.42)         | 1.45 (1.19-1.84) | 0.18 (0.12 to 0.24)    |
| Cameroon                         | 101.99(78.08 - 132.21)         | 2.71 (2.09 - 3.46) | 178.32 (137.18-230.79)         | 1.82 (1.41-2.35) | -1.73 (-1.87 to -1.58) |
| Canada                           | 2007.32(1933.23 - 2087.59)     | 5.92 (5.71 - 6.15) | 1909.92 (1757.84-2074.63)      | 2.62 (2.41-2.86) | -3.84 (-4.16 to -3.52) |
| Cape Verde                       | 2.43(1.94 - 2.99)              | 1.02 (0.81 - 1.25) | 5.76 (4.86-6.66)               | 1.29 (1.08-1.5)  | 0.76 (0.65 to 0.86)    |
| Central African Republic         | 49(26.56 - 77.82)              | 5.05 (3.06 - 7.76) | 63.86 (37.56-97.6)             | 3.57 (2.36-5.24) | -1.56 (-1.68 to -1.44) |
| Chad                             | 57.61(41.76 - 74.88)           | 2.18 (1.58 - 2.81) | 79.62 (58.47-106.9)            | 1.71 (1.27-2.26) | -1.13 (-1.28 to -0.97) |
| Chile                            | 277.9(261.61 - 295.9)          | 2.88 (2.72 - 3.06) | 649.92 (581.05-722.14)         | 2.8 (2.5-3.11)   | -0.08 (-0.34 to 0.19)  |
| China                            | 7513.14(6059.76 - 9199.88)     | 0.98 (0.78 - 1.17) | 15759.96 (14248.2-17571.03)    | 0.88 (0.79-0.97) | -0.7 (-0.87 to -0.53)  |
| Colombia                         | 644.17(616.29 - 677.45)        | 3.85 (3.68 - 4.06) | 1352.38 (1181.06-1534.02)      | 2.51 (2.19-2.85) | -2.45 (-2.83 to -2.06) |
| Comoros                          | 8.52(5.68 - 12.37)             | 4.74 (3.14 - 6.77) | 9.01 (6.37-11.91)              | 2.29 (1.62-3.01) | -3.19 (-3.57 to -2.8)  |
| Congo                            | 53.42(37.9 - 77.68)            | 5.57 (4.15 - 7.83) | 76.27 (57.86-94.63)            | 3.81 (2.9-4.7)   | -1.83 (-2.07 to -1.59) |
| Costa Rica                       | 34.45(30.16 - 39.72)           | 2.02 (1.76 - 2.34) | 126.63 (114.03-141.45)         | 2.62 (2.36-2.92) | 0.72 (0.53 to 0.92)    |
| Cote d'Ivoire                    | 88.53(63.74 - 111.54)          | 2.59 (1.89 - 3.24) | 167.89 (130.88-210.74)         | 1.95 (1.56-2.42) | -1.35 (-1.5 to -1.19)  |
| Croatia                          | 122.02(115.24 - 129.34)        | 1.92 (1.82 - 2.03) | 313.81 (289.44-339)            | 3.47 (3.21-3.74) | 2.54 (2.17 to 2.9)     |
| Cuba                             | 547.41(493.24 - 615.66)        | 5.26 (4.75 - 5.92) | 741.28 (658.4-837.68)          | 3.82 (3.39-4.32) | -1.48 (-1.63 to -1.34) |
| Cyprus                           | 55.89(44.21 - 72.91)           | 6.61 (5.31 - 8.55) | 79.14 (66.33-102.57)           | 4.09 (3.45-5.24) | -2.2 (-2.61 to -1.79)  |
| Czech Republic                   | 299.15(282.97 - 315.81)        | 2.16 (2.05 - 2.27) | 580.4 (540.35-626.03)          | 2.75 (2.56-2.96) | 1.34 (1.08 to 1.6)     |
| Democratic Republic of the Congo | 488.75(325.78 - 701.08)        | 3.84 (2.53 - 5.38) | 734.37 (537.67-970.4)          | 2.62 (1.93-3.41) | -1.82 (-2.08 to -1.55) |
| Denmark                          | 601.9(556.44 - 648.59)         | 6.8 (6.3 - 7.3)    | 603.71 (551.87-656.46)         | 4.91 (4.49-5.34) | -1.52 (-1.79 to -1.26) |

| Countries and territories      | 1990                           |                    | 2017                           |                  | 1990-2017              |
|--------------------------------|--------------------------------|--------------------|--------------------------------|------------------|------------------------|
|                                | Death cases                    | ASR per 100,000    | Death cases                    | ASR per 100,000  | EAPC                   |
|                                | No. × 10 <sup>3</sup> (95% UI) | No. (95% UI)       | No. × 10 <sup>3</sup> (95% UI) | No. (95% UI)     | No. (95% UI)           |
| Djibouti                       | 4.97(3.09 - 7.38)              | 4.05 (2.58 - 5.77) | 10.83 (6.97-15.33)             | 2.43 (1.58-3.39) | -2.6 (-2.95 to -2.25)  |
| Dominica                       | 3.62(3.15 - 4.09)              | 4.65 (4.07 - 5.23) | 4.28 (3.86-4.72)               | 4.37 (3.94-4.81) | -0.48 (-0.6 to -0.37)  |
| Dominican Republic             | 59.76(50.5 - 68.54)            | 1.7 (1.44 - 1.97)  | 181.08 (151.41-221.7)          | 2.02 (1.69-2.48) | 0.72 (0.43 to 1.02)    |
| Ecuador                        | 101.05(88.14 - 113.9)          | 1.96 (1.71 - 2.21) | 280.08 (253.23-313.19)         | 1.97 (1.78-2.21) | 0.05 (-0.13 to 0.24)   |
| Egypt                          | 267.88(170.14 - 489.82)        | 1.12 (0.74 - 2.03) | 709.93 (415.1-1156.24)         | 1.44 (0.88-2.32) | 0.85 (0.77 to 0.93)    |
| El Salvador                    | 35.47(30.71 - 40.56)           | 1.23 (1.06 - 1.41) | 75.81 (62.56-89.61)            | 1.3 (1.07-1.54)  | 0.27 (0.09 to 0.46)    |
| Equatorial Guinea              | 8.81(5.04 - 14.46)             | 5.15 (3.23 - 8.18) | 12.06 (8.34-16.83)             | 3.21 (2.27-4.37) | -2.26 (-2.56 to -1.95) |
| Eritrea                        | 42.78(25.74 - 70.42)           | 5.17 (3.45 - 8.05) | 46.83 (29.82-64.76)            | 2.47 (1.62-3.34) | -3.38 (-3.67 to -3.09) |
| Estonia                        | 57.69(52.94 - 62.89)           | 2.75 (2.53 - 2.98) | 77.35 (65.67-96.02)            | 2.81 (2.38-3.46) | -0.07 (-0.42 to 0.28)  |
| Ethiopia                       | 425.53(243.69 - 725.98)        | 2.66 (1.7 - 4.24)  | 445.65 (305.2-616.19)          | 1.34 (0.91-1.91) | -3 (-3.22 to -2.78)    |
| Federated States of Micronesia | 2.22(1.68 - 2.81)              | 5.15 (4.04 - 6.41) | 2.28 (1.78-2.83)               | 4.12 (3.41-5.02) | -1.06 (-1.15 to -0.96) |
| Fiji                           | 18(15.42 - 20.73)              | 5.98 (5.13 - 6.92) | 33.63 (28.92-38.66)            | 5.76 (4.98-6.56) | -0.37 (-0.58 to -0.16) |
| Finland                        | 600.81(542.59 - 665.59)        | 8.09 (7.33 - 8.94) | 582.78 (534.59-641.66)         | 4.44 (4.07-4.88) | -2.26 (-2.38 to -2.13) |
| France                         | 3351.27(3202.83 - 3513.72)     | 3.72 (3.57 - 3.89) | 3370.62 (3103.87-3647.59)      | 2.08 (1.91-2.27) | -2.65 (-2.95 to -2.35) |
| Gabon                          | 27.43(20.52 - 35.36)           | 5.29 (3.93 - 6.72) | 33.5 (25.17-40.34)             | 3.67 (2.76-4.45) | -1.67 (-1.81 to -1.53) |
| Georgia                        | 57.22(51.23 - 64.67)           | 0.96 (0.87 - 1.08) | 174.09 (158.01-193.84)         | 2.97 (2.71-3.28) | 5.94 (4.94 to 6.96)    |
| Germany                        | 5346.26(4939.95 - 5797.64)     | 3.94 (3.67 - 4.24) | 5233.65 (4677.69-5865.5)       | 2.5 (2.24-2.79)  | -1.87 (-2.02 to -1.71) |
| Ghana                          | 136.16(110.26 - 161.54)        | 2.49 (2.03 - 2.94) | 232.14 (190.37-282.26)         | 1.75 (1.45-2.11) | -2.23 (-2.88 to -1.58) |
| Greece                         | 620.18(591.53 - 651.57)        | 4.06 (3.88 - 4.25) | 1095.14 (1005.23-1191.06)      | 4.23 (3.92-4.6)  | -0.03 (-0.34 to 0.28)  |
| Greenland                      | 0.94(0.75 - 1.09)              | 3.5 (2.82 - 4.08)  | 1.24 (1.02-1.42)               | 2.19 (1.83-2.51) | -2.08 (-2.28 to -1.89) |
| Grenada                        | 4.14(3.59 - 4.77)              | 5.61 (4.85 - 6.44) | 7.82 (7.1-8.57)                | 4.62 (4.21-5.04) | -0.77 (-1.06 to -0.48) |
| Guam                           | 4.23(3.08 - 5.1)               | 6.31 (4.71 - 7.44) | 6.01 (5-8.42)                  | 3.61 (3.03-5.02) | -2.56 (-2.82 to -2.3)  |
| Guatemala                      | 51.55(44.66 - 58.87)           | 1.77 (1.5 - 2.01)  | 109.55 (97.44-123.57)          | 1.12 (1-1.25)    | -2.33 (-2.66 to -2.01) |
| Guinea                         | 73.89(56.38 - 101.36)          | 2.42 (1.85 - 3.29) | 98.99 (71.04-135.25)           | 2.03 (1.48-2.74) | -0.74 (-0.98 to -0.49) |
| Guinea-Bissau                  | 13.78(9.06 - 19.95)            | 3.89 (2.67 - 5.52) | 14.15 (9.43-20.11)             | 2.34 (1.63-3.23) | -2.18 (-2.39 to -1.98) |

| Countries and territories | 1990                           |                    | 2017                           |                  | 1990-2017              |
|---------------------------|--------------------------------|--------------------|--------------------------------|------------------|------------------------|
|                           | Death cases                    | ASR per 100,000    | Death cases                    | ASR per 100,000  | EAPC                   |
|                           | No. × 10 <sup>3</sup> (95% UI) | No. (95% UI)       | No. × 10 <sup>3</sup> (95% UI) | No. (95% UI)     | No. (95% UI)           |
| Guyana                    | 8.15(7.41 - 8.89)              | 2.3 (2.09 - 2.52)  | 17.31 (15.23-19.51)            | 3.2 (2.82-3.6)   | 1.17 (0.63 to 1.71)    |
| Haiti                     | 106.68(68.6 - 150.74)          | 3.94 (2.68 - 5.45) | 202.14 (159.69-262.01)         | 3.69 (2.97-4.75) | -0.22 (-0.27 to -0.18) |
| Honduras                  | 22.5(17.33 - 29.35)            | 1.17 (0.87 - 1.53) | 67.93 (51.86-90.55)            | 1.25 (0.95-1.66) | 0.14 (-0.03 to 0.31)   |
| Hungary                   | 381.21(365.99 - 396.51)        | 2.57 (2.47 - 2.67) | 502.05 (465.95-540.17)         | 2.55 (2.37-2.74) | 0.01 (-0.2 to 0.22)    |
| Iceland                   | 13.11(12.13 - 14.14)           | 4.3 (3.98 - 4.63)  | 17.82 (16.42-19.35)            | 3.05 (2.81-3.32) | -1.69 (-1.92 to -1.47) |
| India                     | 6005.05(4477.59 - 8362.56)     | 1.58 (1.23 - 2.17) | 16865.6 (13985.44-20194.29)    | 1.82 (1.51-2.17) | 0.41 (0.21 to 0.61)    |
| Indonesia                 | 1047.49(852.81 - 1316.85)      | 1.37 (1.09 - 1.73) | 2922.72 (2374.6-3797.26)       | 1.76 (1.44-2.27) | 0.96 (0.9 to 1.01)     |
| Iran                      | 189.88(161.88 - 230.37)        | 0.83 (0.7 - 1.01)  | 612.14 (509.57-664.24)         | 0.97 (0.8-1.05)  | 0.81 (0.65 to 0.96)    |
| Iraq                      | 255.44(205.5 - 312.65)         | 3.85 (3.15 - 4.65) | 278.6 (248.98-310.7)           | 1.46 (1.28-1.63) | -3.97 (-4.49 to -3.46) |
| Ireland                   | 250.01(237.48 - 263.72)        | 5.76 (5.5 - 6.06)  | 306.48 (277.71-335.63)         | 4.05 (3.67-4.43) | -1.98 (-2.38 to -1.58) |
| Israel                    | 116.71(107.26 - 127.84)        | 2.41 (2.23 - 2.62) | 189.22 (170.97-207.86)         | 1.57 (1.41-1.73) | -2.03 (-2.21 to -1.85) |
| Italy                     | 2663.11(2551.54 - 2800.66)     | 2.85 (2.74 - 2.99) | 3864.28 (3565.27-4202)         | 2.35 (2.16-2.55) | -1.29 (-1.72 to -0.86) |
| Jamaica                   | 36.88(33.1 - 42.91)            | 1.99 (1.79 - 2.33) | 70.63 (58.98-83.03)            | 2.4 (1.99-2.83)  | 0.24 (-0.12 to 0.6)    |
| Japan                     | 5963.25(5856.39 - 6087.48)     | 3.65 (3.59 - 3.73) | 19130 (18186.28-19865.08)      | 4.32 (4.1-4.52)  | 0.98 (0.8 to 1.15)     |
| Jordan                    | 26.83(18.58 - 35.6)            | 2.04 (1.44 - 2.73) | 79.84 (66.47-102.76)           | 1.7 (1.42-2.19)  | -1.08 (-1.29 to -0.87) |
| Kazakhstan                | 202.3(172.4 - 243.17)          | 1.57 (1.32 - 1.89) | 320.53 (294.13-350.48)         | 1.93 (1.77-2.09) | 0.19 (-0.25 to 0.64)   |
| Kenya                     | 191.67(137.11 - 246.43)        | 2.67 (1.89 - 3.5)  | 350.05 (272.48-446.94)         | 1.99 (1.54-2.61) | -1.45 (-1.63 to -1.26) |
| Kiribati                  | 0.53(0.45 - 0.6)               | 1.56 (1.34 - 1.75) | 0.95 (0.77-1.15)               | 1.61 (1.33-1.91) | 0.11 (0.08 to 0.15)    |
| Kuwait                    | 8.14(7.56 - 8.77)              | 1.29 (1.18 - 1.41) | 29.11 (24.94-34.42)            | 1.3 (1.11-1.54)  | 0.45 (0.02 to 0.88)    |
| Kyrgyzstan                | 25.02(22.52 - 29.37)           | 0.86 (0.77 - 1.02) | 31.77 (28.76-35.82)            | 0.78 (0.7-0.87)  | -0.5 (-0.69 to -0.32)  |
| Laos                      | 40.4(27.86 - 63.52)            | 2.31 (1.65 - 3.57) | 67.12 (53.26-89.08)            | 1.94 (1.55-2.57) | -0.8 (-0.86 to -0.74)  |
| Latvia                    | 90.15(82.08 - 99.96)           | 2.44 (2.23 - 2.69) | 88.83 (78.49-99.7)             | 2.13 (1.88-2.39) | -0.77 (-1.08 to -0.45) |
| Lebanon                   | 22.94(17.61 - 35.99)           | 1.15 (0.89 - 1.8)  | 62.19 (48.31-84.63)            | 1.12 (0.88-1.51) | 0.07 (-0.04 to 0.18)   |
| Lesotho                   | 22.61(17.27 - 29.16)           | 2.64 (2.05 - 3.37) | 25.99 (18.9-33.14)             | 2.51 (1.89-3.15) | 0 (-0.12 to 0.13)      |
| Liberia                   | 27.57(18.53 - 36.01)           | 2.65 (1.78 - 3.44) | 28.14 (20.14-37.11)            | 1.7 (1.22-2.23)  | -1.87 (-2.18 to -1.56) |

| Countries and territories | 1990                           |                    | 2017                           |                  | 1990-2017              |
|---------------------------|--------------------------------|--------------------|--------------------------------|------------------|------------------------|
|                           | Death cases                    | ASR per 100,000    | Death cases                    | ASR per 100,000  | EAPC                   |
|                           | No. × 10 <sup>3</sup> (95% UI) | No. (95% UI)       | No. × 10 <sup>3</sup> (95% UI) | No. (95% UI)     | No. (95% UI)           |
| Libya                     | 14.99(11.18 - 21.88)           | 0.84 (0.63 - 1.23) | 44.05 (33.09-60.88)            | 1.07 (0.8-1.47)  | 1.12 (0.95 to 1.28)    |
| Lithuania                 | 95.76(86.78 - 105.99)          | 2.07 (1.88 - 2.27) | 151.35 (138.8-163.97)          | 2.6 (2.39-2.82)  | 0.92 (0.57 to 1.28)    |
| Luxembourg                | 24.67(22.84 - 26.58)           | 4.35 (4.05 - 4.66) | 32.64 (28.74-36.99)            | 3.14 (2.76-3.57) | -1.85 (-2.13 to -1.56) |
| Macedonia                 | 24.86(21.37 - 34.28)           | 1.49 (1.29 - 2.03) | 55.42 (43.38-65.66)            | 1.67 (1.31-1.97) | 0.41 (0.24 to 0.59)    |
| Madagascar                | 274.64(176.77 - 390.95)        | 5.63 (3.6 - 7.86)  | 338.73 (230.44-471.92)         | 3.64 (2.46-4.97) | -2.15 (-2.38 to -1.91) |
| Malawi                    | 96.54(52.66 - 142.94)          | 2.73 (1.52 - 3.92) | 139.92 (91.08-191.2)           | 2.03 (1.33-2.82) | -1.68 (-2.02 to -1.34) |
| Malaysia                  | 346.08(276.42 - 399.76)        | 4.61 (3.65 - 5.33) | 833.13 (685.37-949.1)          | 3.97 (3.24-4.55) | -0.84 (-1.04 to -0.64) |
| Maldives                  | 2.26(1.39 - 3.12)              | 3.62 (2.49 - 4.91) | 5.46 (4.69-6.25)               | 2.19 (1.88-2.52) | -2.38 (-2.67 to -2.09) |
| Mali                      | 90.25(56.53 - 131.81)          | 2.72 (1.77 - 3.87) | 117.44 (82.66-160.89)          | 1.76 (1.25-2.37) | -1.95 (-2.2 to -1.71)  |
| Malta                     | 12.34(11.4 - 13.35)            | 2.94 (2.73 - 3.16) | 21.59 (19.55-23.63)            | 2.33 (2.11-2.54) | -1.44 (-1.7 to -1.18)  |
| Marshall Islands          | 0.84(0.52 - 1.13)              | 5.91 (3.89 - 7.91) | 1.36 (0.89-1.82)               | 5.26 (3.79-6.76) | -0.6 (-0.74 to -0.46)  |
| Mauritania                | 30.28(24.04 - 41.35)           | 3.18 (2.56 - 4.28) | 32.46 (25.17-42.33)            | 1.87 (1.46-2.41) | -2.31 (-2.6 to -2.02)  |
| Mauritius                 | 10.74(9.92 - 11.64)            | 1.59 (1.47 - 1.72) | 16.16 (14.73-17.71)            | 1.09 (0.99-1.19) | -1.55 (-1.75 to -1.34) |
| Mexico                    | 526.84(512.54 - 543.58)        | 1.31 (1.27 - 1.35) | 1027.43 (978.77-1071.29)       | 0.96 (0.91-1)    | -1.36 (-1.53 to -1.2)  |
| Moldova                   | 42.68(38.87 - 47.51)           | 1.01 (0.93 - 1.11) | 71 (65.53-76.57)               | 1.26 (1.17-1.36) | 1.09 (0.76 to 1.41)    |
| Mongolia                  | 9.79(8.44 - 12.53)             | 1.02 (0.88 - 1.28) | 17.45 (15.01-20.66)            | 0.94 (0.81-1.09) | -0.71 (-1 to -0.41)    |
| Montenegro                | 40.96(36.24 - 48.65)           | 6.66 (5.94 - 7.93) | 72.45 (63.46-83.52)            | 7.31 (6.43-8.4)  | 0.5 (0.39 to 0.62)     |
| Morocco                   | 125.3(87.85 - 187.69)          | 0.93 (0.64 - 1.39) | 327.22 (240.58-457.09)         | 1.13 (0.84-1.58) | 0.71 (0.6 to 0.82)     |
| Mozambique                | 208(123.74 - 302.53)           | 3.94 (2.33 - 5.58) | 307.27 (218.19-432.92)         | 3.19 (2.26-4.38) | -0.84 (-0.97 to -0.71) |
| Myanmar                   | 280.81(183.84 - 410.92)        | 1.46 (1.01 - 2.08) | 491.9 (392.22-615.04)          | 1.29 (1.04-1.6)  | -0.53 (-0.6 to -0.47)  |
| Namibia                   | 23.51(17.94 - 29.28)           | 3.79 (2.9 - 4.62)  | 30.89 (24.73-37.56)            | 2.45 (1.98-2.94) | -2.18 (-2.6 to -1.76)  |
| Nepal                     | 89.72(64 - 137.6)              | 1.13 (0.82 - 1.71) | 286.15 (223.3-369.38)          | 1.52 (1.19-1.95) | 1.34 (1.12 to 1.56)    |
| Netherlands               | 1478.5(1412.05 - 1546.43)      | 6.94 (6.64 - 7.25) | 1480.54 (1368.81-1590.87)      | 4.06 (3.76-4.36) | -2.53 (-2.96 to -2.09) |
| New Zealand               | 402.91(383.27 - 422.48)        | 9.75 (9.29 - 10.2) | 387.3 (357.79-419.86)          | 4.73 (4.36-5.13) | -3.28 (-3.5 to -3.06)  |
| Nicaragua                 | 15.72(13.22 - 18)              | 1.07 (0.9 - 1.23)  | 37.78 (33.08-44)               | 0.86 (0.75-1)    | -1.03 (-1.17 to -0.89) |

| Countries and territories        | 1990                           |                    | 2017                           |                  | 1990-2017              |
|----------------------------------|--------------------------------|--------------------|--------------------------------|------------------|------------------------|
|                                  | Death cases                    | ASR per 100,000    | Death cases                    | ASR per 100,000  | EAPC                   |
|                                  | No. × 10 <sup>3</sup> (95% UI) | No. (95% UI)       | No. × 10 <sup>3</sup> (95% UI) | No. (95% UI)     | No. (95% UI)           |
| Niger                            | 52.6(38.14 - 70.67)            | 2.22 (1.63 - 2.96) | 78.44 (53.69-109.99)           | 1.33 (0.93-1.83) | -2.22 (-2.48 to -1.97) |
| Nigeria                          | 959.01(672.65 - 1317.63)       | 2.39 (1.71 - 3.24) | 1062.76 (723.3-1653.84)        | 1.53 (1.06-2.33) | -2.18 (-2.42 to -1.94) |
| North Korea                      | 176.94(141.57 - 218.89)        | 1.17 (0.94 - 1.45) | 349.83 (284.82-438.6)          | 1.17 (0.95-1.48) | -0.2 (-0.32 to -0.09)  |
| Northern Mariana Islands         | 0.71(0.58 - 0.86)              | 5.59 (4.6 - 6.61)  | 0.97 (0.84-1.19)               | 2.37 (2.06-2.87) | -3.72 (-3.99 to -3.45) |
| Norway                           | 554.12(539.22 - 569.41)        | 7.35 (7.16 - 7.55) | 533.35 (508.78-557.91)         | 5.12 (4.88-5.38) | -1.78 (-2.09 to -1.48) |
| Oman                             | 14.64(10.15 - 25.24)           | 2.2 (1.57 - 3.7)   | 33.26 (23.18-49)               | 1.89 (1.36-2.71) | -0.56 (-0.78 to -0.34) |
| Pakistan                         | 1231.08(967.53 - 1601.92)      | 2.36 (1.85 - 3.09) | 2842.09 (2172.59-3661.63)      | 3.24 (2.48-4.16) | 1.01 (0.93 to 1.09)    |
| Palestine                        | 15.23(11.7 - 20.42)            | 1.79 (1.39 - 2.4)  | 32.59 (28.37-37.45)            | 1.6 (1.39-1.83)  | -0.36 (-0.57 to -0.14) |
| Panama                           | 38.05(33.98 - 42.25)           | 2.64 (2.35 - 2.93) | 72.35 (65.63-79.43)            | 1.82 (1.65-2)    | -1.88 (-2.12 to -1.65) |
| Papua New Guinea                 | 76.59(46.76 - 111.55)          | 4.71 (3.24 - 6.59) | 159.65 (105.94-223.11)         | 4.19 (3.05-5.56) | -0.64 (-0.73 to -0.55) |
| Paraguay                         | 57.86(49.25 - 65.73)           | 2.74 (2.35 - 3.12) | 157.89 (130.47-192.28)         | 3.12 (2.57-3.78) | 0.56 (0.4 to 0.72)     |
| Peru                             | 160.38(138.25 - 193.01)        | 1.39 (1.19 - 1.68) | 333.97 (277.29-396.94)         | 1.07 (0.89-1.27) | -1.12 (-1.3 to -0.94)  |
| Philippines                      | 592.33(521.83 - 682.34)        | 2.28 (2.01 - 2.63) | 1277.97 (1116.68-1458.54)      | 2.15 (1.89-2.44) | -0.97 (-1.48 to -0.46) |
| Poland                           | 1489.49(1266.4 - 1747)         | 3.31 (2.83 - 3.88) | 2045.88 (1900.34-2209.5)       | 2.92 (2.71-3.15) | -0.48 (-0.73 to -0.23) |
| Portugal                         | 289.12(276.38 - 302.85)        | 2.15 (2.06 - 2.25) | 468.9 (430.25-509.41)          | 1.79 (1.63-1.94) | -1.02 (-1.2 to -0.84)  |
| Puerto Rico                      | 77.83(71.52 - 84.83)           | 2.1 (1.93 - 2.28)  | 86.35 (78.65-95.55)            | 1.12 (1.02-1.24) | -3.14 (-3.41 to -2.86) |
| Qatar                            | 2.27(1.75 - 3.45)              | 2.95 (2.4 - 4.27)  | 7.81 (6.11-9.97)               | 1.24 (1.02-1.55) | -4.2 (-4.68 to -3.72)  |
| Romania                          | 481.21(430.02 - 538.23)        | 1.79 (1.62 - 1.99) | 770.33 (718.39-824.05)         | 2.08 (1.94-2.22) | 0.66 (0.47 to 0.85)    |
| Russian Federation               | 4751.2(4494.53 - 4973.74)      | 2.65 (2.51 - 2.77) | 8132.14 (7871.13-8395.43)      | 3.49 (3.38-3.61) | 0.74 (0.46 to 1.02)    |
| Rwanda                           | 98.47(64.13 - 146.72)          | 3.96 (2.55 - 5.81) | 74.51 (50.37-111.9)            | 1.62 (1.1-2.43)  | -4.25 (-4.7 to -3.79)  |
| Saint Lucia                      | 6.19(5.33 - 7.39)              | 7.05 (6.08 - 8.38) | 10.78 (9.76-11.81)             | 5.27 (4.77-5.78) | -1.42 (-1.6 to -1.25)  |
| Saint Vincent and the Grenadines | 2.43(2.22 - 2.65)              | 3.24 (2.97 - 3.52) | 3.92 (3.56-4.29)               | 2.85 (2.59-3.13) | -0.57 (-0.7 to -0.44)  |
| Samoa                            | 2.49(1.94 - 3.08)              | 3.53 (2.75 - 4.4)  | 3.62 (2.79-4.39)               | 3.14 (2.41-3.82) | -0.7 (-0.83 to -0.56)  |
| Sao Tome and Principe            | 1.25(0.85 - 1.82)              | 1.92 (1.31 - 2.76) | 1.62 (1.27-2.11)               | 1.78 (1.4-2.27)  | -0.76 (-1.02 to -0.5)  |
| Saudi Arabia                     | 52.97(39.75 - 69.41)           | 0.95 (0.71 - 1.24) | 184.48 (144.39-229.49)         | 1.53 (1.15-1.87) | 2.44 (2.16 to 2.72)    |

| Countries and territories  | 1990                           |                    | 2017                           |                  | 1990-2017              |
|----------------------------|--------------------------------|--------------------|--------------------------------|------------------|------------------------|
|                            | Death cases                    | ASR per 100,000    | Death cases                    | ASR per 100,000  | EAPC                   |
|                            | No. × 10 <sup>3</sup> (95% UI) | No. (95% UI)       | No. × 10 <sup>3</sup> (95% UI) | No. (95% UI)     | No. (95% UI)           |
| Senegal                    | 61.48(45.88 - 79.91)           | 2.11 (1.58 - 2.71) | 83.16 (66.6-103.98)            | 1.31 (1.06-1.64) | -2.26 (-2.59 to -1.92) |
| Serbia                     | 335.2(285.72 - 395.88)         | 3.04 (2.62 - 3.59) | 642.13 (506.58-729.39)         | 4.03 (3.19-4.56) | 1.53 (1.37 to 1.69)    |
| Seychelles                 | 1.24(1.06 - 1.54)              | 2.2 (1.87 - 2.72)  | 1.91 (1.58-2.46)               | 1.99 (1.65-2.55) | -0.6 (-0.73 to -0.48)  |
| Sierra Leone               | 47.43(34.2 - 61.6)             | 2.58 (1.88 - 3.33) | 57.83 (45.97-72.93)            | 1.9 (1.52-2.38)  | -1.32 (-1.47 to -1.17) |
| Singapore                  | 71.8(67.35 - 76.3)             | 3.6 (3.38 - 3.83)  | 119.48 (108.43-131.6)          | 1.83 (1.66-2.02) | -2.55 (-2.69 to -2.42) |
| Slovakia                   | 111.73(91.92 - 170.74)         | 1.88 (1.56 - 2.86) | 166.64 (141.92-185.78)         | 1.88 (1.6-2.09)  | 0.34 (-0.03 to 0.72)   |
| Slovenia                   | 52.69(48.9 - 58.23)            | 2.16 (2.01 - 2.39) | 106.26 (95.45-117.31)          | 2.41 (2.17-2.65) | 0.17 (-0.33 to 0.67)   |
| Solomon Islands            | 3.34(2.31 - 4.64)              | 2.92 (2.15 - 3.96) | 6.52 (4.94-8.56)               | 2.5 (1.91-3.2)   | -0.67 (-0.71 to -0.63) |
| Somalia                    | 96.77(51.72 - 162.53)          | 4.56 (2.71 - 7.12) | 126.96 (84.54-183.11)          | 2.41 (1.6-3.37)  | -3.15 (-3.53 to -2.77) |
| South Africa               | 615.97(484.15 - 732.29)        | 3.1 (2.41 - 3.75)  | 931.88 (846.25-1110.27)        | 2.35 (2.14-2.81) | -1.56 (-2.26 to -0.85) |
| South Korea                | 464.83(406.67 - 535.89)        | 1.92 (1.7 - 2.19)  | 1302.29 (1172.22-1442.44)      | 1.63 (1.47-1.8)  | -0.7 (-0.84 to -0.56)  |
| South Sudan                | 85.32(47.92 - 140.97)          | 4.12 (2.49 - 6.4)  | 66.01 (42.19-98.77)            | 2.15 (1.39-3.13) | -3.11 (-3.45 to -2.77) |
| Spain                      | 1483.47(1421.26 - 1546.74)     | 2.62 (2.52 - 2.73) | 2472.5 (2263-2705.78)          | 2.27 (2.07-2.48) | -1.16 (-1.6 to -0.73)  |
| Sri Lanka                  | 173.14(147.43 - 206.59)        | 1.93 (1.67 - 2.27) | 374.3 (289.72-470.86)          | 1.75 (1.36-2.2)  | -0.6 (-0.88 to -0.33)  |
| Sudan                      | 86.16(55.56 - 143.01)          | 0.99 (0.63 - 1.63) | 182.29 (120.78-279.44)         | 1.1 (0.72-1.71)  | 0.47 (0.32 to 0.62)    |
| Suriname                   | 6.4(5.54 - 7.23)               | 2.72 (2.34 - 3.08) | 13.36 (11.7-15.13)             | 2.48 (2.17-2.8)  | -0.69 (-0.89 to -0.49) |
| Swaziland                  | 8.13(6.48 - 9.82)              | 3.32 (2.66 - 4.02) | 12.49 (9.45-15.59)             | 2.63 (2.06-3.25) | -0.67 (-0.95 to -0.39) |
| Sweden                     | 1143.78(1098.67 - 1188.37)     | 6.84 (6.59 - 7.09) | 1059.94 (987.86-1151.52)       | 4.5 (4.2-4.86)   | -1.97 (-2.33 to -1.6)  |
| Switzerland                | 521.73(462.04 - 587.47)        | 4.58 (4.07 - 5.13) | 545.06 (498.93-597.76)         | 2.8 (2.56-3.06)  | -2.03 (-2.16 to -1.9)  |
| Syria                      | 82.58(61.67 - 116.98)          | 1.73 (1.34 - 2.43) | 186.61 (154-229.17)            | 1.7 (1.41-2.06)  | -0.55 (-0.79 to -0.31) |
| Taiwan (Province of China) | 187.29(177.86 - 197.54)        | 1.29 (1.22 - 1.36) | 996.62 (926.64-1070.01)        | 2.61 (2.43-2.81) | 2.64 (2.21 to 3.07)    |
| Tajikistan                 | 43.06(35.7 - 52.57)            | 1.63 (1.33 - 2.01) | 82.33 (68.85-91.67)            | 1.89 (1.53-2.14) | 0.07 (-0.23 to 0.37)   |
| Tanzania                   | 307.8(200.73 - 418.95)         | 3.31 (2.17 - 4.44) | 520.15 (365.03-738.63)         | 2.49 (1.75-3.55) | -1.7 (-2.01 to -1.39)  |
| Thailand                   | 607.24(479.69 - 736.62)        | 2.18 (1.74 - 2.63) | 1627.93 (1354.47-1817.24)      | 1.77 (1.48-1.98) | -1.28 (-1.44 to -1.11) |
| The Bahamas                | 5.97(5.41 - 6.67)              | 4.14 (3.75 - 4.62) | 12.21 (11.06-13.5)             | 3.64 (3.29-4.02) | -0.53 (-0.62 to -0.43) |

| Countries and territories | 1990                           |                         | 2017                            |                  | 1990-2017              |
|---------------------------|--------------------------------|-------------------------|---------------------------------|------------------|------------------------|
|                           | Death cases                    | ASR per 100,000         | Death cases                     | ASR per 100,000  | EAPC                   |
|                           | No. × 10 <sup>3</sup> (95% UI) | No. (95% UI)            | No. × 10 <sup>3</sup> (95% UI)  | No. (95% UI)     | No. (95% UI)           |
| The Gambia                | 8.74(6.16 - 11.64)             | 2.82 (2.03 - 3.69)      | 17.14 (13.24-21.67)             | 2.02 (1.58-2.52) | -1.43 (-1.58 to -1.28) |
| Timor-Leste               | 2.68(1.94 - 3.74)              | 1.25 (0.88 - 1.75)      | 10.07 (7.4-16.19)               | 1.51 (1.13-2.35) | 0.7 (0.58 to 0.82)     |
| Togo                      | 29.41(22.29 - 38.06)           | 2.75 (2.08 - 3.55)      | 54.67 (42.56-69.45)             | 1.89 (1.51-2.37) | -1.64 (-1.8 to -1.47)  |
| Tonga                     | 1.01(0.86 - 1.2)               | 2.09 (1.79 - 2.48)      | 1.5 (1.21-1.79)                 | 1.98 (1.62-2.37) | -0.22 (-0.27 to -0.18) |
| Trinidad and Tobago       | 44.18(40.24 - 49.26)           | 5.35 (4.87 - 5.94)      | 72.26 (60.58-86.31)             | 4.18 (3.52-4.99) | -1.33 (-1.56 to -1.09) |
| Tunisia                   | 41.88(31.36 - 62.58)           | 0.98 (0.74 - 1.48)      | 116.36 (82.23-164.22)           | 1.04 (0.74-1.46) | -0.01 (-0.14 to 0.11)  |
| Turkey                    | 953.47(693.94 - 1327.05)       | 2.8 (2.06 - 3.98)       | 2155.73 (1876.13-2696.34)       | 2.51 (2.19-3.15) | -0.35 (-0.71 to 0)     |
| Turkmenistan              | 20.71(18.33 - 24.15)           | 1.18 (1.01 - 1.4)       | 80.78 (67.02-98.63)             | 2.36 (1.91-2.94) | 2.84 (2.43 to 3.24)    |
| Uganda                    | 145.16(93.34 - 210.24)         | 2.57 (1.63 - 3.8)       | 196.53 (129.98-286.12)          | 1.72 (1.14-2.55) | -2.16 (-2.5 to -1.83)  |
| Ukraine                   | 1577.05(1431 - 1797.39)        | 2.16 (1.97 - 2.44)      | 1937.21 (1810.88-2076.27)       | 2.56 (2.38-2.73) | 0.21 (-0.13 to 0.55)   |
| United Arab Emirates      | 6.22(4.01 - 10.94)             | 1.47 (0.87 - 2.7)       | 67.68 (45.68-117.12)            | 2.07 (1.37-3.64) | 1.31 (1.11 to 1.51)    |
| United Kingdom            | 9399.59(9249.31 - 9543.37)     | 9.29 (9.15 - 9.44)      | 7709.94 (7516.57-7934.43)       | 5.37 (5.24-5.53) | -2.73 (-3.11 to -2.35) |
| United States             | 16528.93(16278.95<br>16778.96) | -<br>4.78 (4.71 - 4.86) | 13081.38<br>(12627.95-13516.43) | 2.32 (2.23-2.39) | -3.42 (-3.71 to -3.13) |
| Uruguay                   | 240(221.31 - 259.02)           | 5.97 (5.51 - 6.42)      | 284.26 (253.51-316.94)          | 4.97 (4.41-5.56) | -0.94 (-1.09 to -0.78) |
| Uzbekistan                | 63.94(47.82 - 79.75)           | 0.59 (0.43 - 0.74)      | 219.29 (193.76-248.76)          | 1.3 (1.15-1.46)  | 3.45 (3.19 to 3.71)    |
| Vanuatu                   | 2.61(1.87 - 3.48)              | 4.41 (3.19 - 5.78)      | 5.9 (4.11-8.8)                  | 4.1 (2.88-5.95)  | -0.39 (-0.44 to -0.33) |
| Venezuela                 | 246.1(221.72 - 273.37)         | 2.72 (2.46 - 3.04)      | 588.28 (504.41-684.51)          | 2.3 (1.97-2.67)  | -1.1 (-1.32 to -0.89)  |
| Vietnam                   | 536.29(419.63 - 719.59)        | 1.45 (1.13 - 1.94)      | 1225.2 (1014.99-1505.78)        | 1.51 (1.26-1.85) | -0.05 (-0.16 to 0.06)  |
| Virgin Islands, U.S.      | 2.66(2.36 - 2.96)              | 3.56 (3.19 - 3.97)      | 5.98 (4.89-6.89)                | 3.26 (2.7-3.71)  | -0.48 (-0.66 to -0.3)  |
| Yemen                     | 50.24(27.89 - 100.07)          | 1.07 (0.62 - 2.07)      | 151.41 (104.24-224.27)          | 1.32 (0.91-1.92) | 0.75 (0.67 to 0.83)    |
| Zambia                    | 79.36(53.06 - 109.91)          | 3.28 (2.15 - 4.41)      | 115.05 (81.38-146.81)           | 2.13 (1.52-2.73) | -2.45 (-2.83 to -2.07) |
| Zimbabwe                  | 98.5(76.72 - 116.23)           | 2.64 (2.12 - 3.08)      | 179.81 (131.48-231.11)          | 2.92 (2.18-3.64) | 0.74 (0.11 to 1.37)    |

ASR: Age-standardized rate; EAPC: Estimated annual percentage change.

**e-Table 3 The DALYs and age-standardized DALYs rate of aneurysm in 1990 and 2017, and its temporal trends from 1990 to 2017 in 195 countries and territories.**

| Countries and territories | 1990                           |                          | 2017                           |                        | 1990-2017              |
|---------------------------|--------------------------------|--------------------------|--------------------------------|------------------------|------------------------|
|                           | DALYs                          | ASR per 100,000          | DALYs                          | ASR per 100,000        | EAPC                   |
|                           | No. × 10 <sup>3</sup> (95% UI) | No. (95% UI)             | No. × 10 <sup>3</sup> (95% UI) | No. (95% UI)           | No. (95% UI)           |
| Afghanistan               | 1930.04(798.21 - 4216.74)      | 26.57 (11.59 - 57.69)    | 3482.75 (2160.9 - 6186.67)     | 26.92 (17.59-46.85)    | 0.08 (-0.03 to 0.19)   |
| Albania                   | 523.48(472.27 - 603.96)        | 21.82 (19.6 - 25.6)      | 846.5 (670.08 - 1046.66)       | 21.5 (17.01-26.54)     | 0.15 (-0.14 to 0.43)   |
| Algeria                   | 2584.52(1867.86 - 3672.01)     | 18.78 (13.5 - 26.6)      | 5872.84 (4282.52 - 8029.89)    | 17.27 (12.52-23.73)    | -0.27 (-0.35 to -0.19) |
| American Samoa            | 17.33(14.33 - 19.63)           | 71.31 (59.61 - 81.13)    | 18.88 (16.28 - 23.23)          | 43.9 (38.19-53.23)     | -2.12 (-2.46 to -1.79) |
| Andorra                   | 69.7(50.21 - 90.54)            | 117.81 (85.59 - 152.52)  | 94.26 (67.21 - 123.38)         | 70.81 (50.37-93.06)    | -2.17 (-2.32 to -2.02) |
| Angola                    | 3842.72(2228.38 - 6214.07)     | 91.94 (57.62 - 143.46)   | 6840.07 (5197.07 - 9084.23)    | 61.62 (48.23-79.51)    | -1.92 (-2.12 to -1.73) |
| Antigua and Barbuda       | 25.9(23.21 - 28.76)            | 48.61 (43.71 - 54.05)    | 34.11 (31.05 - 37.88)          | 34.54 (31.4-38.42)     | -1.65 (-1.85 to -1.45) |
| Argentina                 | 41134.29(37208.26 - 46278.35)  | 124.43 (112.73 - 139.75) | 42613.85 (37740.93 - 48012.1)  | 80.31 (71.03-90.65)    | -2 (-2.2 to -1.81)     |
| Armenia                   | 3437.97(3012.49 - 3986.99)     | 123.94 (108.62 - 143.83) | 6249.36 (5832.53 - 6711.62)    | 150.34 (140.17-161.18) | 0.79 (0.57 to 1.02)    |
| Australia                 | 24153.41(23191.45 - 25082.74)  | 117.33 (112.75 - 121.86) | 17648.36 (15790.5 - 19749.12)  | 43.33 (38.68-48.55)    | -4.33 (-4.56 to -4.1)  |
| Austria                   | 7892.72(7531.64 - 8262.68)     | 68.54 (65.46 - 71.58)    | 6882.64 (6339.58 - 7462.79)    | 42.03 (38.5-45.65)     | -2.38 (-2.63 to -2.12) |
| Azerbaijan                | 1395.07(1152.15 - 1743.13)     | 25.87 (20.79 - 33.54)    | 3364.36 (2821.82 - 3874.4)     | 36.76 (30.37-42.41)    | 0.91 (0.68 to 1.15)    |
| Bahrain                   | 63.31(55.51 - 75.02)           | 28.45 (24.23 - 36.86)    | 178.45 (146.05 - 212.64)       | 16.94 (14.61-19.93)    | -2.28 (-2.51 to -2.05) |
| Bangladesh                | 14691.52(9900.33 - 21403.43)   | 29.15 (20.04 - 42.62)    | 34488.43 (26812.66 - 44133.54) | 28 (21.85-35.9)        | 0.04 (-0.14 to 0.21)   |
| Barbados                  | 153.44(135.27 - 173.04)        | 50.61 (44.9 - 56.58)     | 193.16 (171.49 - 217.42)       | 40.37 (35.86-45.35)    | -1.24 (-1.41 to -1.06) |
| Belarus                   | 6114.56(4904.83 - 7197.31)     | 46.59 (37.56 - 55.27)    | 8302.17 (7315.31 - 9519.17)    | 54.25 (47.5-62.86)     | 0.49 (0.18 to 0.81)    |
| Belgium                   | 12741.2(12063.26 - 13466.43)   | 80.94 (76.74 - 85.42)    | 9797.76 (8923.58 - 10737.07)   | 43.19 (39.28-47.39)    | -2.82 (-3.02 to -2.61) |
| Belize                    | 29.44(25.86 - 34.08)           | 30.32 (26.59 - 35.19)    | 79.66 (71.15 - 86.69)          | 30.61 (27.2-33.5)      | -0.7 (-1.16 to -0.24)  |
| Benin                     | 1004.77(756.98 - 1335.98)      | 46.81 (35.05 - 61.94)    | 1586.96 (1102.5 - 2211.35)     | 32.2 (22.91-44.14)     | -1.6 (-1.76 to -1.45)  |
| Bermuda                   | 89.39(72.05 - 104.47)          | 139.91 (112.98 - 163.36) | 100.31 (90.93 - 110.2)         | 80.37 (72.85-88.21)    | -2.28 (-2.4 to -2.15)  |
| Bhutan                    | 96.51(65.51 - 139.58)          | 36.55 (25.71 - 51.52)    | 269.83 (201.65 - 359.07)       | 43.93 (32.92-58.63)    | 0.78 (0.72 to 0.84)    |
| Bolivia                   | 1800.11(1009.9 - 2600.26)      | 50.61 (28.91 - 72.42)    | 3625.2 (2692.87 - 4683.2)      | 41.35 (30.83-53.48)    | -0.73 (-0.77 to -0.69) |
| Bosnia and Herzegovina    | 2389.73(1958.81 - 2910.8)      | 54.52 (45.47 - 66.07)    | 3370.11 (2686.13 - 3816.21)    | 58.79 (47.52-66.44)    | 0.18 (-0.05 to 0.41)   |

| Countries and territories | 1990                            |                         | 2017                              |                      | 1990-2017              |
|---------------------------|---------------------------------|-------------------------|-----------------------------------|----------------------|------------------------|
|                           | DALYs                           | ASR per 100,000         | DALYs                             | ASR per 100,000      | EAPC                   |
|                           | No. × 10 <sup>3</sup> (95% UI)  | No. (95% UI)            | No. × 10 <sup>3</sup> (95% UI)    | No. (95% UI)         | No. (95% UI)           |
| Botswana                  | 379.96(293.52 - 476.94)         | 61.25 (48.06 - 75.73)   | 511.4 (403.69 - 666.17)           | 37.97 (30.18-49.25)  | -1.92 (-2.04 to -1.81) |
| Brazil                    | 88492.99(86384.89 - 90748.53)   | 88.53 (86.5 - 90.71)    | 210007.31 (200166.3 - 218697.83)  | 91.32 (87.08-95.03)  | -0.18 (-0.34 to -0.01) |
| Brunei                    | 128.83(97.28 - 160.85)          | 113.66 (87.22 - 141.78) | 298.84 (265.27 - 337.99)          | 93.92 (83.74-106)    | -0.59 (-0.78 to -0.41) |
| Bulgaria                  | 4967.25(4584.22 - 5312.74)      | 42.1 (39.05 - 44.8)     | 6788.37 (6233.1 - 7381.31)        | 57.93 (53.08-63.11)  | 1.29 (1.01 to 1.56)    |
| Burkina Faso              | 1787.55(1266.63 - 2419.3)       | 38.53 (27.29 - 51.75)   | 2793.22 (2045.2 - 3805.09)        | 31.02 (22.99-41.82)  | -0.88 (-1 to -0.76)    |
| Burundi                   | 2500.29(1642.5 - 3639.23)       | 101.64 (70.25 - 146.11) | 1720.99 (1184.07 - 2404.56)       | 38.82 (26.87-54.59)  | -4.32 (-4.75 to -3.9)  |
| Cambodia                  | 1243.48(698.39 - 2049.37)       | 25.94 (15.41 - 42.25)   | 2800.89 (2273.91 - 3627.18)       | 25.27 (20.82-32.75)  | -0.19 (-0.27 to -0.11) |
| Cameroon                  | 2468.74(1890.89 - 3237.22)      | 52.18 (40.21 - 67.95)   | 4441.48 (3406.99 - 5771.88)       | 35.96 (27.7-46.55)   | -1.64 (-1.78 to -1.49) |
| Canada                    | 33437.42(32118.57 - 34803.55)   | 98.56 (94.82 - 102.54)  | 27289.68 (25023.05 - 29542.35)    | 41.59 (38.16-45.12)  | -4.01 (-4.33 to -3.68) |
| Cape Verde                | 49.58(39.93 - 60.4)             | 21.03 (16.97 - 25.61)   | 109.11 (90.95 - 127.06)           | 24.36 (20.2-28.6)    | 0.46 (0.39 to 0.54)    |
| Central African Republic  | 1311.92(666.75 - 2145.02)       | 105.97 (58.37 - 167.76) | 1784.98 (950.06 - 2847.36)        | 77.26 (46.05-117.73) | -1.45 (-1.58 to -1.33) |
| Chad                      | 1257.01(916.8 - 1636.46)        | 42.01 (30.65 - 54.64)   | 1869.19 (1372.85 - 2525.08)       | 32.84 (24.1-44.41)   | -1.11 (-1.27 to -0.95) |
| Chile                     | 5916.12(5530.49 - 6347.7)       | 56.05 (52.56 - 60.1)    | 12003.09 (10639.32 - 13509.02)    | 52.45 (46.53-59.17)  | -0.13 (-0.34 to 0.09)  |
| China                     | 191163.4(157359.64 - 245087.71) | 20.38 (16.61 - 25.58)   | 330759.23 (295635.53 - 367747.77) | 17.24 (15.4-19.05)   | -0.97 (-1.2 to -0.74)  |
| Colombia                  | 15181.96(14546.81 - 15885.24)   | 78.39 (75.06 - 82.42)   | 25809.99 (22387.47 - 29436.55)    | 48.15 (41.74-54.89)  | -2.65 (-3 to -2.31)    |
| Comoros                   | 223.82(150.65 - 332.63)         | 99.39 (66.75 - 145.48)  | 204.62 (146.82 - 273.8)           | 43.91 (31.21-58.69)  | -3.54 (-3.96 to -3.12) |
| Congo                     | 1344(908.41 - 1988.27)          | 115.6 (81.53 - 168.55)  | 1871.41 (1410.52 - 2379.67)       | 73.53 (55.41-91.32)  | -2.15 (-2.42 to -1.89) |
| Costa Rica                | 732.09(650.22 - 836.51)         | 38.14 (33.71 - 43.8)    | 2512.58 (2274.24 - 2779.83)       | 51.07 (46.22-56.46)  | 0.88 (0.67 to 1.09)    |
| Cote d'Ivoire             | 2442.43(1753.36 - 3114.27)      | 52.22 (37.56 - 65.63)   | 4414.78 (3406.89 - 5597.99)       | 39.21 (30.53-49.41)  | -1.4 (-1.59 to -1.22)  |
| Croatia                   | 2811.66(2653.44 - 2980.73)      | 43.43 (41.12 - 45.9)    | 5618.68 (5183.51 - 6086.37)       | 69.02 (63.56-75.15)  | 1.91 (1.53 to 2.29)    |
| Cuba                      | 9449.72(8559.47 - 10675.2)      | 88.79 (80.53 - 100.16)  | 11826.16 (10449.73 - 13502.99)    | 63.63 (56.26-72.62)  | -1.51 (-1.65 to -1.36) |
| Cyprus                    | 1039.09(822.03 - 1257.61)       | 120.54 (96.34 - 143.96) | 1410.18 (1203.4 - 1664.43)        | 75.03 (64-87.54)     | -2.12 (-2.5 to -1.75)  |
| Czech Republic            | 6528.31(6149.59 - 6903.96)      | 48.15 (45.35 - 50.76)   | 10458.49 (9688.63 - 11347.16)     | 53.93 (49.92-58.4)   | 0.83 (0.61 to 1.05)    |

| Countries and territories        | 1990                           |                          | 2017                           |                      | 1990-2017              |
|----------------------------------|--------------------------------|--------------------------|--------------------------------|----------------------|------------------------|
|                                  | DALYs                          | ASR per 100,000          | DALYs                          | ASR per 100,000      | EAPC                   |
|                                  | No. × 10 <sup>3</sup> (95% UI) | No. (95% UI)             | No. × 10 <sup>3</sup> (95% UI) | No. (95% UI)         | No. (95% UI)           |
| Democratic Republic of the Congo | 12124.69(8100.54 - 17548.07)   | 73.66 (49.05 - 104.35)   | 18389.86 (13361.36 - 24714.18) | 51.85 (37.88-68.73)  | -1.69 (-1.95 to -1.44) |
| Denmark                          | 10379.37(9577.26 - 11158.29)   | 124.94 (115.4 - 134.12)  | 8642.64 (7860.44 - 9475.26)    | 75.21 (68.62-82.17)  | -2.33 (-2.64 to -2.02) |
| Djibouti                         | 147.41(91.28 - 221.14)         | 82.05 (51.38 - 121.25)   | 280.88 (178.48 - 398.53)       | 47.14 (30.32-66.74)  | -2.79 (-3.14 to -2.43) |
| Dominica                         | 59.43(52 - 66.89)              | 78.96 (69.63 - 88.75)    | 68.07 (61.47 - 74.77)          | 73.77 (66.66-81.24)  | -0.48 (-0.61 to -0.36) |
| Dominican Republic               | 1288.69(1066.81 - 1471.92)     | 31.36 (26.14 - 35.76)    | 3649.86 (3014.15 - 4432.28)    | 39.09 (32.19-47.89)  | 0.81 (0.52 to 1.11)    |
| Ecuador                          | 2261.25(1996.41 - 2530.74)     | 37.73 (32.89 - 42.54)    | 5385.48 (4801.03 - 6076.43)    | 35.84 (32.02-40.35)  | -0.15 (-0.35 to 0.05)  |
| Egypt                            | 7055.46(4391.28 - 12735.8)     | 23.01 (14.62 - 41.86)    | 18368.23 (10647.26 - 30167.67) | 29.33 (17.27-47.71)  | 0.92 (0.83 to 1.01)    |
| El Salvador                      | 776.69(682.39 - 913.18)        | 23.62 (20.86 - 27.42)    | 1378.59 (1127.74 - 1665.16)    | 23.89 (19.55-28.77)  | 0.06 (-0.12 to 0.23)   |
| Equatorial Guinea                | 225.62(118.02 - 384.2)         | 108.16 (61.11 - 178.74)  | 278.4 (186.95 - 396.63)        | 58.58 (40.09-82.05)  | -2.85 (-3.22 to -2.48) |
| Eritrea                          | 1333.04(731.47 - 2295.71)      | 117.02 (71.6 - 191.2)    | 1388.67 (873.46 - 1958.51)     | 52.28 (33.4-72.12)   | -3.69 (-3.99 to -3.39) |
| Estonia                          | 1278.89(1163.14 - 1403.76)     | 62.09 (56.59 - 68.15)    | 1400.57 (1180.15 - 1719.45)    | 58.02 (48.9-70.15)   | -0.55 (-0.95 to -0.14) |
| Ethiopia                         | 11465.1(5930.77 - 20474.76)    | 53.22 (30.96 - 90.26)    | 10227.36 (7062.62 - 13406.72)  | 24.55 (16.76-33.25)  | -3.4 (-3.63 to -3.16)  |
| Federated States of Micronesia   | 53.93(37.94 - 69.97)           | 102.98 (75.85 - 131.77)  | 58.02 (41.91 - 74.69)          | 79.25 (60.73-99.61)  | -1.18 (-1.26 to -1.09) |
| Fiji                             | 472.37(405.4 - 549.08)         | 116 (99.46 - 134.05)     | 812.32 (692.2 - 947.81)        | 108.6 (93.32-125.35) | -0.46 (-0.63 to -0.28) |
| Finland                          | 11030.66(9974.49 - 12173.2)    | 152.27 (138.06 - 166.87) | 8843.47 (8071.85 - 9753.22)    | 75.75 (69.28-83.27)  | -2.59 (-2.74 to -2.45) |
| France                           | 52034.82(49954.21 - 54315.62)  | 62.09 (59.6 - 64.69)     | 44524.47 (40505.48 - 48900.06) | 34.39 (31.06-38.12)  | -2.68 (-2.97 to -2.38) |
| Gabon                            | 622.56(455.71 - 817.1)         | 105.59 (78.71 - 137.47)  | 762.59 (569.37 - 929.58)       | 71.75 (53.76-87.15)  | -1.74 (-1.88 to -1.59) |
| Georgia                          | 1312.76(1147.16 - 1502.33)     | 20.98 (18.51 - 23.89)    | 3648.54 (3327.17 - 4013.64)    | 66.63 (61.09-73.1)   | 6.16 (5.06 to 7.27)    |
| Germany                          | 86183.93(79850.84 - 92866.75)  | 67.88 (63.25 - 73.04)    | 75706.2 (67057.12 - 85258.46)  | 43.76 (38.77-49.34)  | -1.76 (-1.9 to -1.61)  |
| Ghana                            | 3490.13(2814.86 - 4181)        | 49.49 (40.19 - 58.76)    | 5791.92 (4648.05 - 7007.08)    | 34.78 (28.29-42.29)  | -2.14 (-2.78 to -1.49) |
| Greece                           | 11373.18(10860.97 - 11943.92)  | 76.44 (73.14 - 80.32)    | 16887.15 (15586.36 - 18428.85) | 81.28 (75.24-88.4)   | -0.06 (-0.34 to 0.23)  |
| Greenland                        | 21.31(17.06 - 24.62)           | 61.84 (49.24 - 72.09)    | 23.64 (19.5 - 27.05)           | 36.49 (30.17-41.56)  | -2.3 (-2.49 to -2.12)  |
| Grenada                          | 72.97(63.13 - 85.03)           | 102.11 (88.14 - 119.31)  | 127.65 (116.72 - 139)          | 84.85 (77.76-92.5)   | -0.72 (-1 to -0.44)    |
| Guam                             | 107.03(76.48 - 130.55)         | 124.48 (90.24 - 149.48)  | 137.49 (112.77 - 197.45)       | 76.95 (63.49-110.02) | -2.14 (-2.34 to -1.94) |

| Countries and territories | 1990                             |                        | 2017                              |                     | 1990-2017              |
|---------------------------|----------------------------------|------------------------|-----------------------------------|---------------------|------------------------|
|                           | DALYs                            | ASR per 100,000        | DALYs                             | ASR per 100,000     | EAPC                   |
|                           | No. × 10 <sup>3</sup> (95% UI)   | No. (95% UI)           | No. × 10 <sup>3</sup> (95% UI)    | No. (95% UI)        | No. (95% UI)           |
| Guatemala                 | 1167.14(1026.47 - 1352.36)       | 30.04 (26.28 - 34.46)  | 2149.44 (1908.05 - 2438.09)       | 18.91 (16.77-21.36) | -2.4 (-2.72 to -2.08)  |
| Guinea                    | 1631.3(1247.84 - 2279.44)        | 46.54 (35.66 - 64.67)  | 2279.35 (1585.83 - 3187.51)       | 40.01 (27.9-55.23)  | -0.6 (-0.85 to -0.34)  |
| Guinea-Bissau             | 352.18(219.51 - 518.25)          | 79.62 (52.02 - 115.26) | 385.38 (247.29 - 557.91)          | 48.82 (32.54-69.69) | -2.09 (-2.28 to -1.89) |
| Guyana                    | 183.9(169.08 - 198.4)            | 44.8 (41.03 - 48.72)   | 378.39 (330.14 - 431.26)          | 61.54 (53.9-69.76)  | 1.21 (0.67 to 1.76)    |
| Haiti                     | 2507.1(1524.05 - 3576.87)        | 75.26 (47.81 - 106.75) | 4495.79 (3462.97 - 5926.75)       | 67.26 (52.79-87.28) | -0.41 (-0.47 to -0.35) |
| Honduras                  | 516.98(418.87 - 695.13)          | 22.33 (17.75 - 29.26)  | 1320.36 (1009.66 - 1786.96)       | 21.84 (16.64-29.35) | -0.21 (-0.36 to -0.05) |
| Hungary                   | 8174.56(7843.8 - 8500.09)        | 56.08 (53.86 - 58.3)   | 9185.88 (8479.26 - 9899.2)        | 51.31 (47.34-55.34) | -0.34 (-0.57 to -0.12) |
| Iceland                   | 217.89(201.63 - 234.16)          | 74.92 (69.28 - 80.36)  | 252.29 (232.15 - 274.05)          | 48.16 (44.22-52.27) | -2.06 (-2.27 to -1.84) |
| India                     | 146872.32(106010.08 - 205338.01) | 29.95 (22.24 - 41.64)  | 362069.72 (300333.76 - 435937.53) | 33.13 (27.6-39.81)  | 0.24 (0.03 to 0.46)    |
| Indonesia                 | 25382.27(21186.74 - 31998.13)    | 24.88 (20.37 - 31.19)  | 60261.8 (49257.34 - 78069.81)     | 29.6 (24.14-38.35)  | 0.67 (0.6 to 0.74)     |
| Iran                      | 4940.03(4251.94 - 6041.05)       | 16.73 (14.28 - 20.4)   | 12840.46 (10741.89 - 13878)       | 17.81 (14.93-19.26) | 0.57 (0.4 to 0.73)     |
| Iraq                      | 5546.76(4247.14 - 7000.63)       | 68.27 (53.55 - 84.79)  | 5917.65 (5264.66 - 6948.89)       | 25.02 (22.35-28.68) | -4.18 (-4.77 to -3.58) |
| Ireland                   | 4225.19(4018.27 - 4450.68)       | 97.17 (92.47 - 102.25) | 4393.46 (3947.85 - 4897.35)       | 60.41 (54.29-67.48) | -2.48 (-2.91 to -2.05) |
| Israel                    | 1971.59(1821.57 - 2151.11)       | 39.41 (36.6 - 42.81)   | 2773.68 (2493.13 - 3070.57)       | 25.02 (22.46-27.68) | -2.17 (-2.37 to -1.98) |
| Italy                     | 48885.56(46774.42 - 51086.88)    | 54.72 (52.42 - 57.03)  | 54222.94 (49586.61 - 59349.68)    | 40.37 (36.74-44.57) | -1.68 (-2.08 to -1.28) |
| Jamaica                   | 668.53(596.81 - 762.13)          | 36.64 (32.73 - 41.72)  | 1370.64 (1118.8 - 1638.48)        | 47.63 (38.86-57.06) | 0.56 (0.16 to 0.95)    |
| Japan                     | 98999.17(97047.52 - 101029.01)   | 57.94 (56.79 - 59.12)  | 229473.76 (216994.82 - 240683.29) | 68.71 (64.74-72.68) | 0.99 (0.81 to 1.18)    |
| Jordan                    | 763.67(516.61 - 985.25)          | 43.81 (29.87 - 59.05)  | 1885.33 (1574.92 - 2367.93)       | 29.93 (24.91-38.59) | -1.91 (-2.14 to -1.68) |
| Kazakhstan                | 5410.45(4731.71 - 6449.79)       | 38.4 (33.45 - 45.9)    | 8442.48 (7649.69 - 9563.82)       | 46.66 (42.55-52.29) | 0.13 (-0.42 to 0.68)   |
| Kenya                     | 4485.9(3262.26 - 5564.98)        | 50.09 (36.06 - 63.78)  | 8567.69 (6731.09 - 10467.57)      | 38.2 (29.79-48.41)  | -1.32 (-1.51 to -1.13) |
| Kiribati                  | 15.41(12.9 - 17.51)              | 35.15 (29.83 - 39.59)  | 28.46 (22.35 - 34.71)             | 35.92 (28.79-43.54) | 0.08 (0.04 to 0.12)    |
| Kuwait                    | 262.18(241.01 - 285.2)           | 27.53 (25.42 - 29.8)   | 742.14 (625.17 - 886.13)          | 25.32 (21.34-30.34) | 0.08 (-0.35 to 0.51)   |
| Kyrgyzstan                | 592.41(540.65 - 686.73)          | 18.48 (16.8 - 21.43)   | 766.28 (687.17 - 875.59)          | 16.21 (14.59-18.51) | -0.77 (-1.06 to -0.47) |
| Laos                      | 1034.33(660.01 - 1661.02)        | 45.84 (31.17 - 72.52)  | 1535.14 (1158.13 - 2074.49)       | 35.46 (27.58-47.5)  | -1.12 (-1.18 to -1.06) |

| Countries and territories | 1990                           |                         | 2017                           |                        | 1990-2017              |
|---------------------------|--------------------------------|-------------------------|--------------------------------|------------------------|------------------------|
|                           | DALYs                          | ASR per 100,000         | DALYs                          | ASR per 100,000        | EAPC                   |
|                           | No. × 10 <sup>3</sup> (95% UI) | No. (95% UI)            | No. × 10 <sup>3</sup> (95% UI) | No. (95% UI)           | No. (95% UI)           |
| Latvia                    | 1902.11(1727.9 - 2118.64)      | 52.52 (47.74 - 58.25)   | 1637.53 (1437.9 - 1853.97)     | 44.94 (39.17-51.18)    | -0.96 (-1.34 to -0.58) |
| Lebanon                   | 540.99(410.93 - 860.97)        | 22.82 (17.44 - 35.95)   | 1324.19 (999.44 - 1840.43)     | 21.04 (16.14-29.02)    | -0.11 (-0.24 to 0.01)  |
| Lesotho                   | 509.34(383.52 - 659.95)        | 49.88 (37.82 - 64.38)   | 616.88 (426.42 - 804.2)        | 49.01 (34.59-63.05)    | 0.21 (0.01 to 0.4)     |
| Liberia                   | 621.8(413.63 - 821.22)         | 52.41 (35.02 - 69)      | 682 (484.2 - 917.32)           | 32.91 (23.72-43.8)     | -1.97 (-2.3 to -1.64)  |
| Libya                     | 367.98(275.43 - 543.21)        | 16.7 (12.49 - 24.48)    | 1122.87 (820.1 - 1560.42)      | 21.74 (16.11-30.07)    | 1.19 (1.06 to 1.33)    |
| Lithuania                 | 2204.5(1982.69 - 2464.43)      | 48.28 (43.42 - 53.89)   | 2994.16 (2730.27 - 3257.71)    | 59.23 (53.77-64.78)    | 0.79 (0.38 to 1.2)     |
| Luxembourg                | 434.45(404.15 - 465.33)        | 78.36 (72.93 - 84.08)   | 473.6 (411.12 - 543.65)        | 49.75 (43.17-57.16)    | -2.37 (-2.68 to -2.07) |
| Macedonia                 | 542.52(467.41 - 742.05)        | 28.37 (24.52 - 38.94)   | 1157.2 (877.42 - 1371.87)      | 35.56 (27-42.03)       | 0.95 (0.73 to 1.17)    |
| Madagascar                | 7813.91(5074.17 - 11373.95)    | 126.55 (81.62 - 181.43) | 9916.28 (6726.19 - 14132.41)   | 79.81 (54.25-111.3)    | -2.24 (-2.47 to -2)    |
| Malawi                    | 2208.3(1102.86 - 3473.85)      | 50.79 (27.13 - 77.25)   | 3223.32 (2090.06 - 4411.49)    | 39.95 (26.07-54.41)    | -1.55 (-1.96 to -1.14) |
| Malaysia                  | 6974.04(5781.77 - 8025.93)     | 77.13 (62.31 - 88.95)   | 15910.44 (13369.94 - 18291.34) | 64.85 (53.84-73.98)    | -0.85 (-1.01 to -0.68) |
| Maldives                  | 53.51(28.88 - 76.05)           | 61.01 (37.34 - 84.08)   | 94.05 (80.88 - 108.49)         | 33.54 (28.79-38.71)    | -2.79 (-3.05 to -2.53) |
| Mali                      | 2218.87(1346.72 - 3287.32)     | 52.5 (32.69 - 76.83)    | 2655.4 (1857.75 - 3718.1)      | 31.34 (21.89-43.35)    | -2.29 (-2.57 to -2.01) |
| Malta                     | 220.74(204.74 - 238.94)        | 50.64 (47.1 - 54.65)    | 336.17 (304.14 - 370.16)       | 38.96 (35.37-42.62)    | -1.55 (-1.81 to -1.28) |
| Marshall Islands          | 21.84(12.9 - 29.89)            | 118.2 (72.63 - 160.29)  | 38.71 (23.94 - 52.99)          | 107.42 (71.2-143.67)   | -0.52 (-0.69 to -0.36) |
| Mauritania                | 690.62(544.05 - 928.99)        | 63.82 (50.58 - 86.14)   | 683.67 (526.54 - 895.63)       | 33.82 (26.25-44.57)    | -2.69 (-3 to -2.38)    |
| Mauritius                 | 271.95(251.52 - 294.05)        | 32.9 (30.43 - 35.59)    | 337.45 (305.82 - 372.17)       | 21.19 (19.25-23.23)    | -1.77 (-1.96 to -1.57) |
| Mexico                    | 11082.86(10793.02 - 11413.57)  | 23.39 (22.75 - 24.1)    | 19793.76 (18887.35 - 20654.36) | 17.21 (16.41-17.93)    | -1.32 (-1.45 to -1.18) |
| Moldova                   | 1109.71(1001.62 - 1243.54)     | 24.19 (21.97 - 27.01)   | 1757.81 (1620.75 - 1914.98)    | 32.49 (29.98-35.38)    | 1.45 (1.06 to 1.85)    |
| Mongolia                  | 230.87(195.81 - 303.01)        | 20.5 (17.49 - 26.68)    | 466.57 (397.62 - 568.69)       | 19.11 (16.43-22.67)    | -0.69 (-1.02 to -0.36) |
| Montenegro                | 960.27(848.31 - 1160.61)       | 147.93 (130.87 - 178.3) | 1420.74 (1234.22 - 1633.18)    | 147.15 (127.91-168.85) | 0.05 (-0.1 to 0.19)    |
| Morocco                   | 2977.92(2135.9 - 4487.03)      | 18.98 (13.42 - 28.43)   | 7163.85 (5257 - 10127.01)      | 22.09 (16.18-30.97)    | 0.53 (0.44 to 0.61)    |
| Mozambique                | 5301.01(3234.72 - 7946.88)     | 79.31 (47.59 - 115.9)   | 8289.76 (5758.66 - 12109.35)   | 67.05 (47.25-95.51)    | -0.63 (-0.77 to -0.49) |
| Myanmar                   | 6751.01(4091.04 - 9956.51)     | 27.78 (17.75 - 40.72)   | 9984.41 (7673.09 - 12666.77)   | 22.74 (17.75-28.69)    | -0.85 (-0.92 to -0.77) |
| Namibia                   | 520.49(398.14 - 648.7)         | 69.29 (52.99 - 85.9)    | 597.91 (463.69 - 746.06)       | 42.11 (33.06-52)       | -2.45 (-2.94 to -1.96) |

| Countries and territories | 1990                            |                          | 2017                           |                      | 1990-2017              |
|---------------------------|---------------------------------|--------------------------|--------------------------------|----------------------|------------------------|
|                           | DALYs                           | ASR per 100,000          | DALYs                          | ASR per 100,000      | EAPC                   |
|                           | No. × 10 <sup>3</sup> (95% UI)  | No. (95% UI)             | No. × 10 <sup>3</sup> (95% UI) | No. (95% UI)         | No. (95% UI)           |
| Nepal                     | 2161.78(1499.42 - 3397.57)      | 21.91 (15.53 - 33.73)    | 5839.03 (4440.98 - 7598.18)    | 27.17 (20.9-35.17)   | 1.03 (0.78 to 1.27)    |
| Netherlands               | 24100.35(22981.91 - 25210.34)   | 115.89 (110.63 - 121.36) | 20258.9 (18622.04 - 21919.2)   | 59.82 (55-64.7)      | -3.07 (-3.53 to -2.6)  |
| New Zealand               | 6751.03(6427.61 - 7076.62)      | 163.53 (155.96 - 171.27) | 5554.45 (5143.94 - 6008.76)    | 73.22 (67.83-79.11)  | -3.63 (-3.86 to -3.39) |
| Nicaragua                 | 339.24(292.09 - 384.33)         | 19.27 (16.39 - 21.88)    | 720.73 (619.31 - 865.34)       | 15.39 (13.25-18.29)  | -1.03 (-1.15 to -0.92) |
| Niger                     | 1332.48(960.08 - 1793.71)       | 43.13 (31.25 - 57.99)    | 1931.56 (1268.07 - 2764.13)    | 25.04 (17.02-35.26)  | -2.38 (-2.65 to -2.11) |
| Nigeria                   | 20861.07(14301.15 - 29616.61)   | 44.71 (30.97 - 62.71)    | 23143.98 (15422.16 - 37046.8)  | 27.3 (18.31-43.54)   | -2.37 (-2.62 to -2.12) |
| North Korea               | 4687.55(3587.51 - 5965.39)      | 26.27 (20.65 - 32.88)    | 8507.09 (6954.13 - 10512.64)   | 26.99 (22.03-33.33)  | -0.02 (-0.1 to 0.06)   |
| Northern Mariana Islands  | 19.84(15.8 - 24.19)             | 93.66 (75.93 - 112.31)   | 22.24 (18.98 - 27.52)          | 43.26 (37.36-53.09)  | -3.33 (-3.54 to -3.11) |
| Norway                    | 8886.23(8645.38 - 9131.34)      | 126.22 (122.97 - 129.58) | 7292.4 (6903.22 - 7724.22)     | 77.03 (72.75-81.72)  | -2.3 (-2.6 to -1.99)   |
| Oman                      | 416.55(278.26 - 727.01)         | 47.89 (32.46 - 83.12)    | 960.4 (652.42 - 1441.35)       | 37.9 (26.13-55.23)   | -0.95 (-1.14 to -0.75) |
| Pakistan                  | 25869.53(20743.85 - 33779.09)   | 44.08 (34.87 - 57.65)    | 63470.06 (48614.67 - 80783.98) | 56.7 (43.21-72.21)   | 0.73 (0.62 to 0.85)    |
| Palestine                 | 334.46(241.59 - 450.14)         | 33.9 (24.84 - 46.19)     | 706.81 (620.53 - 817.81)       | 27.71 (24.21-32.12)  | -0.67 (-0.92 to -0.41) |
| Panama                    | 815.81(734.72 - 897.82)         | 50.79 (45.62 - 56.06)    | 1454.44 (1311.88 - 1605.66)    | 36.65 (33.02-40.41)  | -1.58 (-1.79 to -1.38) |
| Papua New Guinea          | 2405.69(1372.54 - 3589.94)      | 110.46 (68.91 - 161.32)  | 5058.58 (3146.21 - 7314.07)    | 95.45 (64.54-132.53) | -0.72 (-0.79 to -0.64) |
| Paraguay                  | 1296.68(1083.2 - 1506.9)        | 54.77 (46.14 - 63.31)    | 3421.75 (2786.3 - 4225.6)      | 62.67 (51.23-77.32)  | 0.56 (0.35 to 0.76)    |
| Peru                      | 3656.53(3172.77 - 4338.1)       | 27.32 (23.65 - 32.6)     | 6230.68 (5076.92 - 7473.12)    | 20.11 (16.37-24.1)   | -1.24 (-1.42 to -1.06) |
| Philippines               | 15196.75(13652.59 - 17261.47)   | 44.7 (39.54 - 51.51)     | 30614.72 (26390.98 - 35100.29) | 40.99 (35.59-46.83)  | -1.12 (-1.67 to -0.57) |
| Poland                    | 32941.44(27833.53 - 38975.46)   | 72.69 (61.55 - 85.78)    | 40122.14 (37044.6 - 43413.39)  | 61.56 (56.73-66.63)  | -0.61 (-0.88 to -0.34) |
| Portugal                  | 5540.39(5294.43 - 5808.1)       | 40.95 (39.22 - 42.83)    | 6988.36 (6305.3 - 7679.12)     | 32.01 (28.71-35.36)  | -1.22 (-1.42 to -1.03) |
| Puerto Rico               | 1364.24(1263.58 - 1474.22)      | 36.28 (33.63 - 39.16)    | 1300.49 (1179.07 - 1440.05)    | 19.45 (17.69-21.47)  | -3.12 (-3.4 to -2.85)  |
| Qatar                     | 70.41(52.19 - 109.42)           | 47.98 (37.62 - 72.17)    | 242.42 (186.38 - 313.81)       | 20.8 (16.49-26.02)   | -3.92 (-4.3 to -3.55)  |
| Romania                   | 11493.57(10300.16 - 12921.22)   | 41.38 (37.28 - 46.24)    | 15024.5 (14010.55 - 16100.3)   | 45.89 (42.76-49.16)  | 0.38 (0.21 to 0.54)    |
| Russian Federation        | 112328.16(104476.84 - 119028.2) | 61.01 (56.64 - 64.7)     | 172621.65 (166252 - 179497.47) | 77.04 (74.06-80.42)  | 0.59 (0.28 to 0.91)    |
| Rwanda                    | 2471.26(1623.15 - 3816.76)      | 78.14 (51.35 - 116.87)   | 1722.51 (1186.32 - 2534.01)    | 29.52 (20.17-44.17)  | -4.72 (-5.24 to -4.2)  |

| Countries and territories        | 1990                           |                          | 2017                           |                     | 1990-2017              |
|----------------------------------|--------------------------------|--------------------------|--------------------------------|---------------------|------------------------|
|                                  | DALYs                          | ASR per 100,000          | DALYs                          | ASR per 100,000     | EAPC                   |
|                                  | No. × 10 <sup>3</sup> (95% UI) | No. (95% UI)             | No. × 10 <sup>3</sup> (95% UI) | No. (95% UI)        | No. (95% UI)           |
| Saint Lucia                      | 112.9(97.58 - 133.03)          | 121.93 (105.53 - 144.02) | 187.54 (170.68 - 205.26)       | 90.83 (82.44-99.45) | -1.44 (-1.62 to -1.25) |
| Saint Vincent and the Grenadines | 43.97(40.45 - 47.55)           | 57.26 (52.68 - 61.87)    | 72.34 (65.71 - 79.17)          | 53.48 (48.45-58.53) | -0.42 (-0.55 to -0.29) |
| Samoa                            | 57.8(45.67 - 71.33)            | 66.32 (51.89 - 81.86)    | 72.76 (56.03 - 90.11)          | 53.95 (41.85-66.25) | -1.05 (-1.19 to -0.92) |
| Sao Tome and Principe            | 27.74(18.75 - 41.53)           | 39.3 (26.6 - 58.48)      | 38.19 (29.86 - 52.51)          | 34.89 (27.29-46.09) | -0.93 (-1.2 to -0.65)  |
| Saudi Arabia                     | 1135.95(817.13 - 1541.25)      | 16.99 (12.43 - 22.89)    | 4821.36 (3663.79 - 6325.47)    | 26.41 (20.55-32.53) | 2.31 (2.03 to 2.59)    |
| Senegal                          | 1419.93(1057.84 - 1862.38)     | 40.98 (30.63 - 53.67)    | 1869.41 (1482.69 - 2355.89)    | 24.97 (19.85-31.37) | -2.33 (-2.68 to -1.99) |
| Serbia                           | 7816.25(6496.56 - 9227.01)     | 66.77 (56.67 - 78.65)    | 11634.05 (8776.9 - 13415.72)   | 76.05 (57.3-87.65)  | 0.89 (0.74 to 1.04)    |
| Seychelles                       | 24.59(21.07 - 30.41)           | 41.99 (35.89 - 52.05)    | 37.68 (30.97 - 49.13)          | 35.92 (29.61-46.59) | -0.9 (-1.05 to -0.74)  |
| Sierra Leone                     | 1075.31(773.9 - 1410.03)       | 51.69 (36.97 - 67.55)    | 1414.39 (1103.5 - 1793.07)     | 37.96 (29.82-48.07) | -1.31 (-1.44 to -1.18) |
| Singapore                        | 1551.05(1448.97 - 1658.03)     | 64.47 (60.42 - 68.39)    | 2120.44 (1917.77 - 2334.8)     | 31.19 (28.1-34.39)  | -2.72 (-2.85 to -2.6)  |
| Slovakia                         | 2655.54(2155.83 - 4126.88)     | 44.57 (36.32 - 68.96)    | 3537.64 (2948.46 - 3959.68)    | 41.44 (34.27-46.24) | 0.16 (-0.22 to 0.54)   |
| Slovenia                         | 1172.82(1091.4 - 1277.26)      | 47.27 (44.11 - 51.44)    | 1843.63 (1658.49 - 2042.29)    | 46.89 (42.15-51.99) | -0.35 (-0.87 to 0.17)  |
| Solomon Islands                  | 90.79(58.1 - 130.22)           | 59.92 (40.87 - 83.46)    | 168.43 (119.74 - 229.99)       | 49.07 (36.95-65.02) | -0.83 (-0.85 to -0.8)  |
| Somalia                          | 2682.49(1267.41 - 4854.93)     | 93.32 (50.18 - 155.97)   | 3446.48 (2218.07 - 5151.2)     | 49.16 (32.7-70.88)  | -3.26 (-3.66 to -2.85) |
| South Africa                     | 14310.93(11768.95 - 16114.44)  | 60.56 (48.5 - 70.39)     | 19696.04 (17899.78 - 23271.54) | 43.65 (39.66-51.84) | -1.78 (-2.59 to -0.96) |
| South Korea                      | 10361.88(8850.09 - 12036.19)   | 33.61 (29.23 - 38.95)    | 19533.09 (17462.47 - 21794.36) | 23.72 (21.28-26.45) | -1.37 (-1.49 to -1.25) |
| South Sudan                      | 2091.87(1054.68 - 3691.73)     | 81.34 (44.65 - 137.1)    | 1691.48 (1033.7 - 2616.47)     | 42.34 (26.97-63.94) | -3.2 (-3.57 to -2.82)  |
| Spain                            | 26816.07(25636.21 - 28075.11)  | 48.77 (46.74 - 50.98)    | 35666.26 (32325.85 - 39247.35) | 39.63 (35.81-43.61) | -1.42 (-1.88 to -0.96) |
| Sri Lanka                        | 3692.11(2969.23 - 4540.92)     | 33.29 (27.6 - 40.28)     | 6783.51 (5197.23 - 8531.62)    | 28.58 (22.07-35.9)  | -0.77 (-1.07 to -0.47) |
| Sudan                            | 2182.1(1427.05 - 3719.32)      | 20.86 (13.64 - 34.96)    | 4426.22 (2984.54 - 6749.59)    | 22.12 (14.75-33.73) | 0.26 (0.14 to 0.39)    |
| Suriname                         | 133.18(117.13 - 150.01)        | 50.56 (44.27 - 57.18)    | 264.81 (230.8 - 301.63)        | 45.98 (40.12-52.26) | -0.73 (-0.95 to -0.52) |
| Swaziland                        | 196.67(155.74 - 238.12)        | 62.05 (49.4 - 74.93)     | 314.76 (232.23 - 400.55)       | 51.49 (38.78-64.35) | -0.36 (-0.72 to 0)     |
| Sweden                           | 18396.59(17704.88 - 19132.38)  | 120.61 (116.31 - 125.36) | 14531.07 (13541.54 - 15645.57) | 71.15 (66.35-76.52) | -2.41 (-2.78 to -2.04) |
| Switzerland                      | 8478.68(7474.48 - 9474.92)     | 80.04 (70.61 - 89.33)    | 7214.13 (6567.77 - 7905.84)    | 42.51 (38.51-46.69) | -2.59 (-2.72 to -2.46) |

| Countries and territories  | 1990                             |                          | 2017                             |                      | 1990-2017              |
|----------------------------|----------------------------------|--------------------------|----------------------------------|----------------------|------------------------|
|                            | DALYs                            | ASR per 100,000          | DALYs                            | ASR per 100,000      | EAPC                   |
|                            | No. × 10 <sup>3</sup> (95% UI)   | No. (95% UI)             | No. × 10 <sup>3</sup> (95% UI)   | No. (95% UI)         | No. (95% UI)           |
| Syria                      | 1943.23(1348.85 - 2748.68)       | 33.35 (23.9 - 47.84)     | 4029.36 (3268.02 - 5043.5)       | 31.01 (25.29-38.42)  | -0.8 (-1.05 to -0.55)  |
| Taiwan (Province of China) | 4446.26(4228.47 - 4669.36)       | 26.12 (24.83 - 27.48)    | 19213.94 (17721.83 - 20796.11)   | 52.23 (48.22-56.46)  | 2.66 (2.28 to 3.05)    |
| Tajikistan                 | 873.22(751.46 - 1026.58)         | 30.33 (25.9 - 35.83)     | 1863.22 (1633.41 - 2089.86)      | 35.5 (30.06-39.58)   | 0.01 (-0.3 to 0.33)    |
| Tanzania                   | 6931.21(4429.21 - 9646.93)       | 60.6 (39.25 - 82.58)     | 11500.04 (7995.22 - 15929.09)    | 46.74 (32.71-65.87)  | -1.65 (-1.98 to -1.32) |
| Thailand                   | 12054.32(9419.3 - 15347.19)      | 34.15 (26.84 - 41.72)    | 26976.39 (23062.34 - 30275.35)   | 28.83 (24.78-32.33)  | -1.24 (-1.45 to -1.03) |
| The Bahamas                | 127.86(114.39 - 144.72)          | 78.07 (70.1 - 88.28)     | 251.03 (226.75 - 279.08)         | 67.3 (60.74-74.88)   | -0.59 (-0.68 to -0.51) |
| The Gambia                 | 218.03(152.19 - 298.15)          | 55.97 (39.53 - 74.73)    | 397.71 (302.55 - 519.77)         | 40.04 (30.8-51.12)   | -1.39 (-1.52 to -1.25) |
| Timor-Leste                | 74.06(52.79 - 105.69)            | 23.04 (16.69 - 32.17)    | 205.14 (144.97 - 327.18)         | 25.69 (18.6-40.5)    | 0.38 (0.24 to 0.52)    |
| Togo                       | 733.15(557.16 - 956.59)          | 53.4 (40.44 - 69.12)     | 1396.59 (1054.38 - 1809.67)      | 37.66 (29.17-47.99)  | -1.54 (-1.69 to -1.38) |
| Tonga                      | 22.76(18.95 - 27.18)             | 39.69 (33.54 - 47.02)    | 32.73 (26.15 - 40.12)            | 40.12 (32.13-49.05)  | 0.11 (0.05 to 0.16)    |
| Trinidad and Tobago        | 912.16(831.46 - 1014.87)         | 103.02 (94.04 - 114.44)  | 1449.74 (1203.63 - 1753.69)      | 80.83 (67.17-97.33)  | -1.3 (-1.54 to -1.07)  |
| Tunisia                    | 881.46(661.62 - 1300.75)         | 16.91 (12.75 - 24.98)    | 2146.43 (1483.59 - 3050.93)      | 17.81 (12.36-25.25)  | -0.09 (-0.25 to 0.07)  |
| Turkey                     | 23173.16(16283.89 - 31020.7)     | 60.4 (42.71 - 82.14)     | 45210.86 (39340.28 - 53041.41)   | 51.49 (44.87-60.7)   | -0.55 (-0.91 to -0.2)  |
| Turkmenistan               | 500.51(454.92 - 566.89)          | 23.98 (21.69 - 27.57)    | 2017.76 (1706.62 - 2409.78)      | 49.54 (41.37-60.07)  | 2.85 (2.41 to 3.29)    |
| Uganda                     | 3415.02(2255.38 - 4900.52)       | 48.9 (31.63 - 70.43)     | 4745.01 (3177.31 - 6919.86)      | 32.65 (21.58-47.31)  | -2.27 (-2.66 to -1.87) |
| Ukraine                    | 36199.84(32968.03 - 40850.98)    | 49.67 (45.49 - 55.72)    | 45982.71 (42621.23 - 49380.6)    | 65.23 (60.27-70.1)   | 0.5 (0.09 to 0.92)     |
| United Arab Emirates       | 212.23(137.94 - 361.12)          | 30.95 (18.53 - 56.41)    | 2405.6 (1640.4 - 4061.92)        | 43.77 (28.54-77.9)   | 1.32 (1.15 to 1.48)    |
| United Kingdom             | 147048.57(144766.27 - 149332.83) | 151.65 (149.41 - 153.94) | 100065.86 (97627.66 - 102955.77) | 78.15 (76.27-80.36)  | -3.2 (-3.58 to -2.83)  |
| United States              | 287172.08(282468.31 - 292258.78) | 87.32 (85.86 - 88.89)    | 222449.6 (214470.2 - 230605.76)  | 44.21 (42.52-45.9)   | -3.23 (-3.5 to -2.95)  |
| Uruguay                    | 4700.7(4310.57 - 5101.44)        | 120.26 (110.36 - 130.21) | 4906.37 (4336.69 - 5514.97)      | 97.08 (85.78-109.45) | -1.02 (-1.17 to -0.88) |
| Uzbekistan                 | 1337.14(1060.1 - 1611.14)        | 11.05 (8.57 - 13.54)     | 4958.23 (4350.56 - 5639.7)       | 22.8 (20.14-25.96)   | 3.18 (2.97 to 3.38)    |
| Vanuatu                    | 71.94(50.88 - 98.93)             | 94.9 (67.97 - 127.6)     | 152.94 (104.83 - 232.19)         | 85.32 (59.16-128.3)  | -0.5 (-0.55 to -0.45)  |
| Venezuela                  | 5287.37(4741.47 - 5847.16)       | 51.38 (46.12 - 56.93)    | 11603.18 (9852.66 - 13527.05)    | 41.58 (35.43-48.55)  | -1.28 (-1.49 to -1.07) |

| Countries and territories | 1990                           |                       | 2017                           |                     | 1990-2017              |
|---------------------------|--------------------------------|-----------------------|--------------------------------|---------------------|------------------------|
|                           | DALYs                          | ASR per 100,000       | DALYs                          | ASR per 100,000     | EAPC                   |
|                           | No. × 10 <sup>3</sup> (95% UI) | No. (95% UI)          | No. × 10 <sup>3</sup> (95% UI) | No. (95% UI)        | No. (95% UI)           |
| Vietnam                   | 10925.14(8690.25 - 14948.1)    | 26.11 (20.57 - 35.47) | 22940.78 (18831.3 - 28971.69)  | 25.77 (21.27-32.42) | -0.21 (-0.29 to -0.13) |
| Virgin Islands, U.S.      | 54.02(48.22 - 60.49)           | 63.09 (56.09 - 70.45) | 109.08 (87.96 - 126.23)        | 57.26 (46.95-65.64) | -0.54 (-0.71 to -0.38) |
| Yemen                     | 1389.09(687.27 - 2847.34)      | 23.71 (12.96 - 47.51) | 3873.7 (2665.87 - 5850.44)     | 26.86 (18.5-40.05)  | 0.38 (0.29 to 0.47)    |
| Zambia                    | 1947.86(1318.46 - 2826.19)     | 62.41 (41.85 - 86.92) | 2849.41 (2030.84 - 3741.04)    | 41.2 (29.13-53.08)  | -2.5 (-2.93 to -2.08)  |
| Zimbabwe                  | 2451.8(1875.93 - 2900.95)      | 53.48 (41.08 - 63.12) | 5012.9 (3581.65 - 6633.52)     | 63.87 (46.59-82.53) | 1.14 (0.37 to 1.91)    |

ASR: Age-standardized rate; DALY: Disability-adjusted life year; EAPC: Estimated annual percentage change.
